# Supplementary material for: Haplotype data and forensic evaluation of 23 Y-STR and 12 X-STR loci in eight ethnic groups from Eritrea
Source: Springer Nature journal article supplement (doi:10.1007/s00414-020-02446-2), 2020-10-21

**Fig. S1** Two-dimensional MDS plot based on Y-chromosome data of analyzed Eritrean and 77 comparison population groups. Population labels are color-coded based on the macro-geographic area as specified in the legend at the top-right

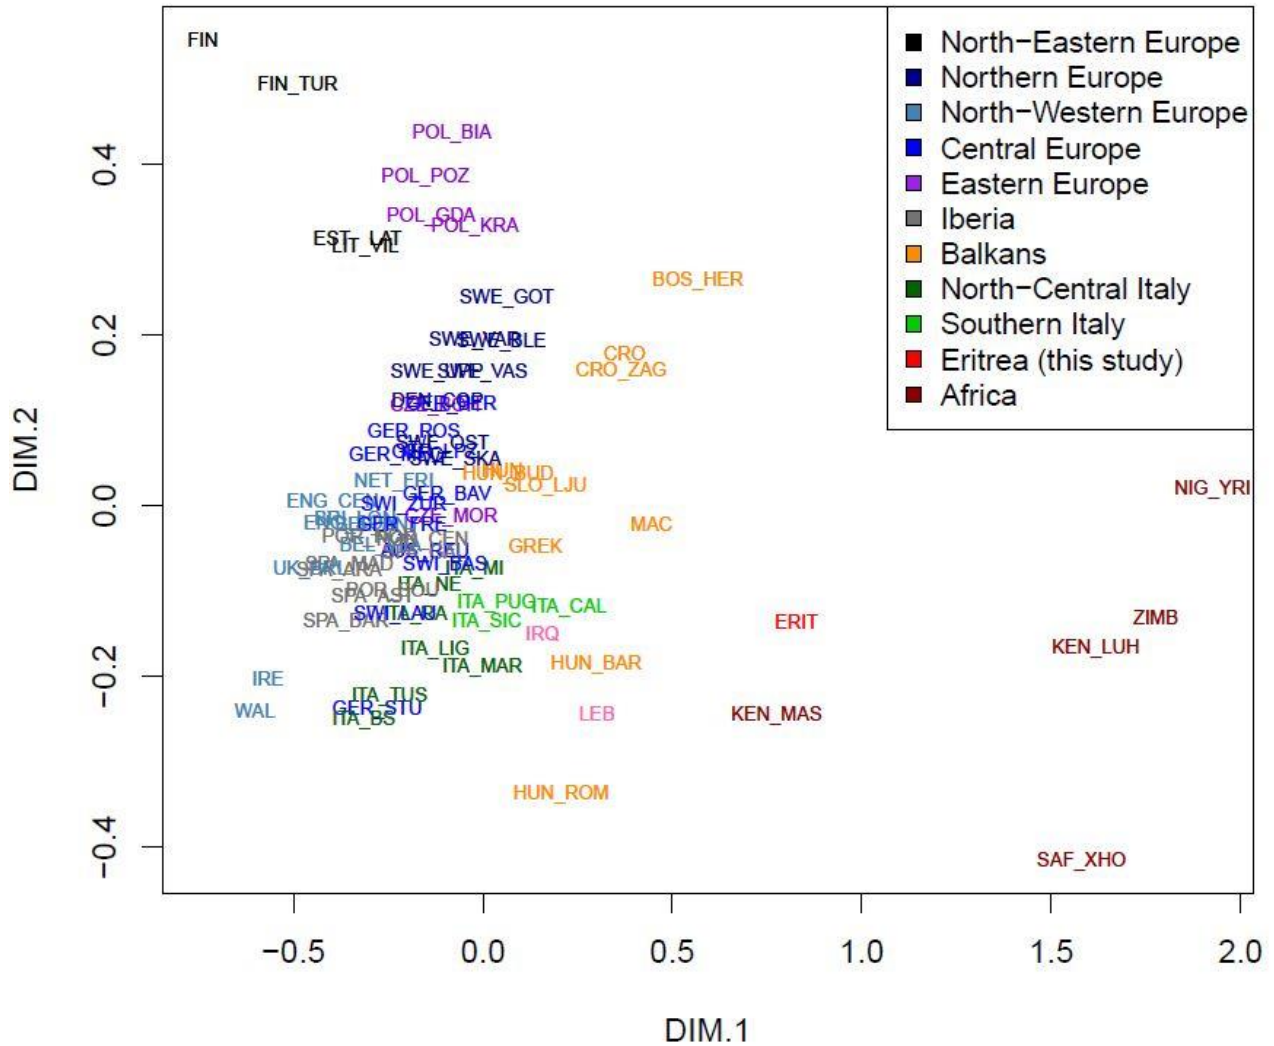

Supplement: MOESM2 [file 414_2020_2446_MOESM2_ESM.pdf]
