# Supplementary material for: Haplotype data and forensic evaluation of 23 Y-STR and 12 X-STR loci in eight ethnic groups from Eritrea
Source: Springer Nature journal article supplement (doi:10.1007/s00414-020-02446-2), 2020-10-21

**Fig. 2** DISTATIS analysis based on X-haplotype frequencies for the four linkage groups in 13 populations from Africa, Asia and Europe

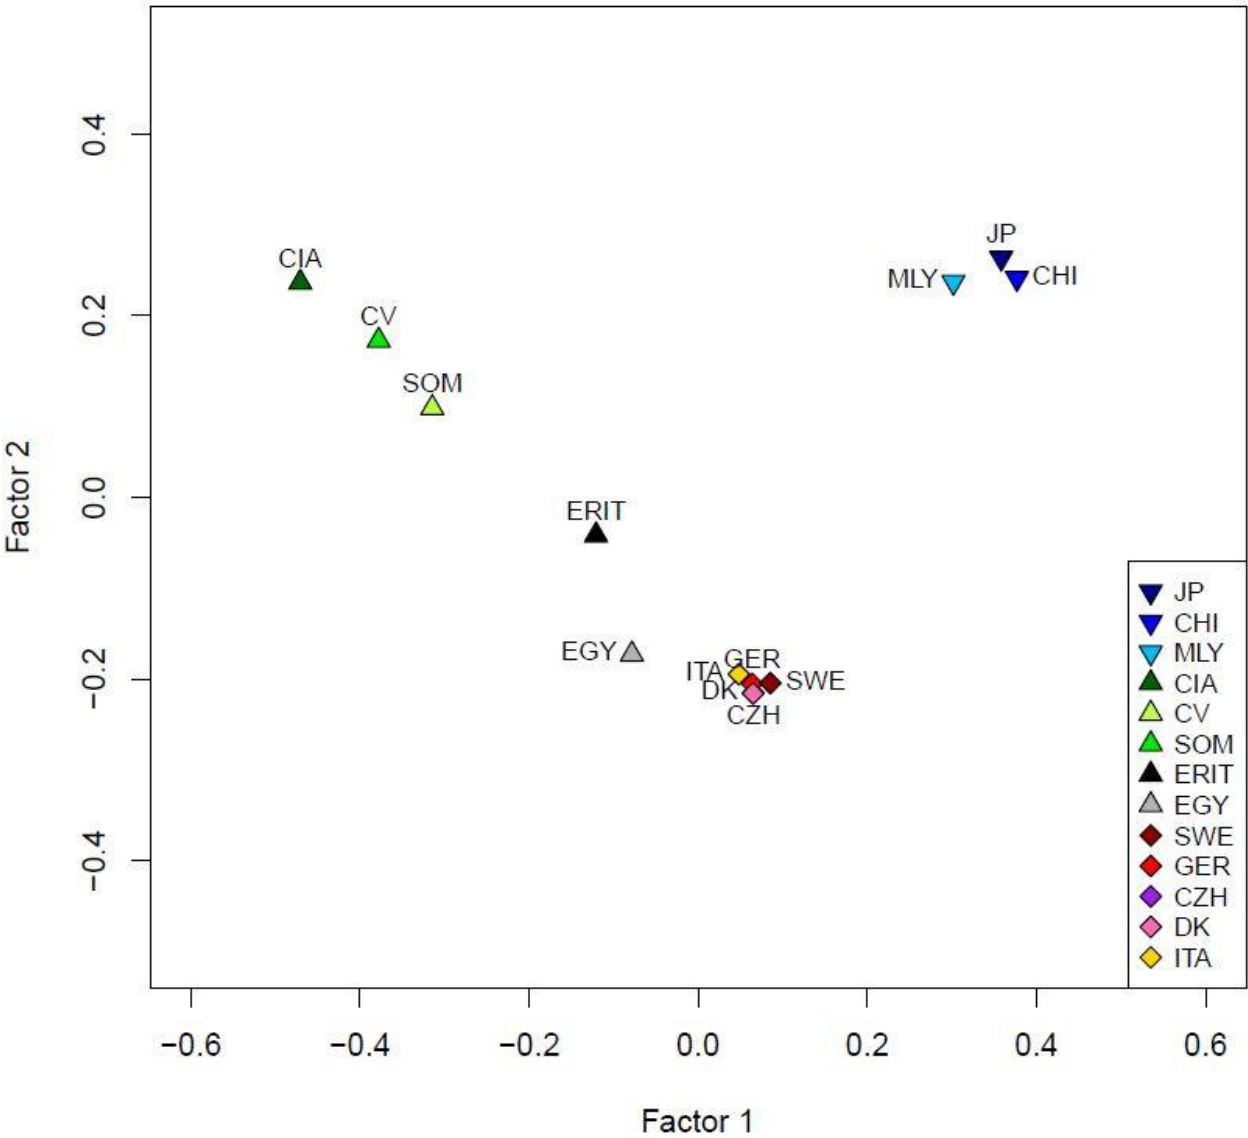

Supplement: MOESM3 [file 414_2020_2446_MOESM3_ESM.pdf]
